# Supplementary material for: Planar tetracoordinate carbon molecules with 14 valence electrons: examples of CBe4Mnn−2 (M = Li, Au; n = 1–3) clusters
Source: Royal Society of Chemistry journal article supplement (doi:10.1039/d0nj03944f), 2020-01-01

## SUPPLEMENTARY INFORMATION

### Planar tetracoordinate carbon molecules with 14 valence electrons: the examples of $\text{CBe}_4\text{M}_n^{n-2}$ ( $\text{M} = \text{Li}, \text{Au}; n = 1-3$ ) clusters

(Submitted to *New Journal of Chemistry*)

Jin-Chang Guo,<sup>‡</sup> Lin-Yan Feng,<sup>‡</sup> and Hua-Jin Zhai\*

*Nanocluster Laboratory, Institute of Molecular Science, Shanxi University, Taiyuan 030006, China*

E-mail: hj.zhai@sxu.edu.cn

- Table S1.** Cartesian coordinates for global-minimum (GM) clusters **1–6** of the  $\text{CBe}_4\text{M}_n^{n-2}$  ( $\text{M} = \text{Li}, \text{Au}; n = 1-3$ ) series at the PBE0-D3/def2-TZVPP level, along with those for their three lowest-lying  $n\mathbf{B}-n\mathbf{D}$  isomeric structures.
- Table S2.** Orbital composition analysis for the canonical molecular orbitals (CMOs) of GM  $\text{CBe}_4\text{Li}^-$  (**1**,  $C_{2v}$ ,  $^1A_1$ ) cluster. Main components greater than 15% are shown in bold.
- Table S3.** Orbital composition analysis for the CMOs of GM  $\text{CBe}_4\text{Au}^-$  (**4**,  $C_{2v}$ ,  $^1A_1$ ) cluster. Main components greater than 15% are shown in bold.
- Table S4.** Orbital composition analysis for the lowest unoccupied molecular orbitals (LUMOs) of the  $\text{CBe}_4\text{M}_3^+$  ( $\text{M} = \text{Li}, \text{Na}, \text{K}, \text{Cu}, \text{Ag}, \text{Au}$ ) series. Main components greater than 15% are shown in bold.

- Figure S1.** Optimized GM structures **1–6** of the  $\text{CBe}_4\text{M}_n^{n-2}$  ( $\text{M} = \text{Li}, \text{Au}; n = 1-3$ ) clusters at the PBE0-D3/def2-TZVPP level, along with their three lowest-lying isomers (**nB–nD**). Relative energies are listed in  $\text{kcal mol}^{-1}$  at the single-point CCSD(T) level using their PBE0-D3 geometries, with zero-point energy (ZPE) corrections at PBE0-D3. Shown in square brackets for comparison are the energetics at single-point CCSD(T)/def2-TZVPP//B3LYP-D3/def2-TZVPP level, including ZPE corrections at B3LYP-D3.
- Figure S2.** Calculated natural atomic charges (in  $|e|$ ; red color) from natural bond orbital (NBO) analyses for GM clusters **1–6** of  $\text{CBe}_4\text{M}_n^{n-2}$  ( $\text{M} = \text{Li}, \text{Au}; n = 1-3$ ).
- Figure S3.** Calculated root-mean-square deviations (RMSDs) of GM clusters **1–6** of  $\text{CBe}_4\text{M}_n^{n-2}$  ( $\text{M} = \text{Li}, \text{Au}; n = 1-3$ ) during the Born-Oppenheimer molecular dynamics (BOMD) simulations at 298 K.
- Figure S4.** Pictures of the occupied CMOs of  $\text{CBe}_4\text{Li}^-$  (**1**) and  $\text{CBe}_4\text{Au}^-$  (**4**) clusters.
- Figure S5.** Optimized tetrahedral carbon (thC) isomeric structures **1'/3'/4'** at the PBE0-D3/def2-TZVPP level. These thC structures are to be compared to their GM ptC clusters **1/3/4**.
- Figure S6.** Comparison of Wiberg bond indices (WBIs) and natural atomic charges (in  $|e|$ ; red color) of GM ptC cluster **3** and thC isomer **3'** at the PBE0-D3/def2-TZVPP level.
- Figure S7.** Nucleus independent chemical shifts (NICSs) for clusters **1–6**. Here the NICS(0) data (blue color) are calculated at the center of a triangle, whereas the NICS(1) values (red color) are at 1 Å above the center of a triangle or above the C center.

**Table S1.** Cartesian coordinates for global-minimum (GM) clusters **1–6** of the  $\text{CBe}_4\text{M}_n^{n-2}$  ( $\text{M} = \text{Li, Au}; n = 1-3$ ) series at the PBE0-D3/def2-TZVPP level, along with those for their three lowest-lying  $n\text{B}-n\text{D}$  isomeric structures.

|                                                       |             |             |            |                                                       |             |             |             |
|-------------------------------------------------------|-------------|-------------|------------|-------------------------------------------------------|-------------|-------------|-------------|
| <b>1</b> $\text{CBe}_4\text{Li}^- (C_{2v}, {}^1A_1)$  |             |             |            | <b>1B</b> $\text{CBe}_4\text{Li}^- (C_s, {}^1A')$     |             |             |             |
| C                                                     | 0.00000000  | 0.70079500  | 0.00000000 | C                                                     | -0.46275100 | -0.36815500 | 0.00000000  |
| Be                                                    | 1.51006100  | 1.24431300  | 0.00000000 | Be                                                    | -0.16507300 | 1.04326500  | 1.00147500  |
| Be                                                    | -1.03601500 | -0.66662900 | 0.00000000 | Be                                                    | -0.16507300 | -0.88359100 | -1.49188900 |
| Be                                                    | 1.03601500  | -0.66662900 | 0.00000000 | Be                                                    | -0.16507300 | -0.88359100 | 1.49188900  |
| Be                                                    | -1.51006100 | 1.24431300  | 0.00000000 | Be                                                    | -0.16507300 | 1.04326500  | -1.00147500 |
| Li                                                    | 0.00000000  | -2.94208000 | 0.00000000 | Li                                                    | 1.80589100  | 0.31051600  | 0.00000000  |
| <b>1C</b> $\text{CBe}_4\text{Li}^- (C_{2v}, {}^1A_1)$ |             |             |            | <b>1D</b> $\text{CBe}_4\text{Li}^- (C_s, {}^1A')$     |             |             |             |
| C                                                     | 0.00000000  | 0.28941800  | 0.00000000 | C                                                     | 0.00000000  | 0.56658900  | 0.00000000  |
| Be                                                    | 0.00000000  | 2.03918100  | 0.00000000 | Be                                                    | -0.65976800 | 2.03264100  | 0.00000000  |
| Be                                                    | 0.00000000  | -1.30417600 | 0.00000000 | Be                                                    | -0.30452900 | -1.13316900 | 0.00000000  |
| Be                                                    | 1.53583100  | 0.82307200  | 0.00000000 | Be                                                    | 1.45278600  | -0.11018400 | 0.00000000  |
| Be                                                    | -1.53583100 | 0.82307200  | 0.00000000 | Be                                                    | -1.68942400 | 0.34858500  | 0.00000000  |
| Li                                                    | 0.00000000  | -3.75370200 | 0.00000000 | Li                                                    | 1.60124600  | -2.65034100 | 0.00000000  |
| <b>2</b> $\text{CBe}_4\text{Li}_2 (C_s, {}^1A')$      |             |             |            | <b>2B</b> $\text{CBe}_4\text{Li}_2 (C_{2v}, {}^1A_1)$ |             |             |             |
| C                                                     | 0.00000000  | -0.87197100 | 0.00000000 | C                                                     | 0.00000000  | 0.00000000  | 0.40514800  |
| Be                                                    | -1.16713100 | -1.97476900 | 0.00000000 | Be                                                    | 0.96738700  | 0.00000000  | 1.72502200  |
| Be                                                    | 0.31194300  | 0.82461900  | 0.00000000 | Be                                                    | -0.96738700 | 0.00000000  | 1.72502200  |
| Be                                                    | -1.50451600 | -0.05143300 | 0.00000000 | Be                                                    | 0.00000000  | 1.34108800  | -0.56976900 |
| Be                                                    | 1.58012100  | -0.66292500 | 0.00000000 | Be                                                    | 0.00000000  | -1.34108800 | -0.56976900 |
| Li                                                    | -1.52998700 | 2.47676900  | 0.00000000 | Li                                                    | 0.00000000  | 3.31541100  | -1.94548500 |
| Li                                                    | 2.56943100  | 1.75318400  | 0.00000000 | Li                                                    | 0.00000000  | -3.31541100 | -1.94548500 |
| <b>2C</b> $\text{CBe}_4\text{Li}_2 (C_s, {}^1A')$     |             |             |            | <b>2D</b> $\text{CBe}_4\text{Li}_2 (C_s, {}^1A')$     |             |             |             |
| C                                                     | 0.00000000  | 0.80696100  | 0.00000000 | C                                                     | -0.43573800 | -0.72017800 | 0.00000000  |
| Be                                                    | -1.57373600 | 0.37070500  | 0.00000000 | Be                                                    | -0.22350700 | -1.18796500 | 1.52669400  |
| Be                                                    | 0.18461500  | -0.92037900 | 0.00000000 | Be                                                    | -0.22350700 | -1.18796500 | -1.52669400 |
| Be                                                    | 1.56820100  | 0.47790800  | 0.00000000 | Be                                                    | -0.22350700 | 0.68498200  | -1.02474800 |
| Be                                                    | -1.70147100 | -1.67369300 | 0.00000000 | Be                                                    | -0.22350700 | 0.68498200  | 1.02474800  |
| Li                                                    | 2.35960600  | -1.95106700 | 0.00000000 | Li                                                    | 1.78073500  | -0.14423600 | 0.00000000  |
| Li                                                    | -0.32975000 | 2.66442300  | 0.00000000 | Li                                                    | 0.28278100  | 2.92587900  | 0.00000000  |

|                                                                                                          |             |             |             |                                                                                             |             |             |             |
|----------------------------------------------------------------------------------------------------------|-------------|-------------|-------------|---------------------------------------------------------------------------------------------|-------------|-------------|-------------|
| <b>3C</b> CBe <sub>4</sub> Li <sub>3</sub> <sup>+</sup> (C <sub>2v</sub> , <sup>1</sup> A <sub>1</sub> ) |             |             |             | <b>3B</b> CBe <sub>4</sub> Li <sub>3</sub> <sup>+</sup> (C <sub>s</sub> , <sup>1</sup> A')  |             |             |             |
| C                                                                                                        | 0.00000000  | 0.79634400  | 0.00000000  | C                                                                                           | 0.43999600  | 0.64025300  | 0.00000000  |
| Be                                                                                                       | 1.51832100  | 1.27286200  | 0.00000000  | Be                                                                                          | 1.51101700  | -0.57281800 | 0.00000000  |
| Be                                                                                                       | -0.98723700 | -0.59274800 | 0.00000000  | Be                                                                                          | -1.15313900 | 1.08558800  | 0.00000000  |
| Be                                                                                                       | 0.98723700  | -0.59274800 | 0.00000000  | Be                                                                                          | -0.40504200 | -0.96363200 | 0.00000000  |
| Be                                                                                                       | -1.51832100 | 1.27286200  | 0.00000000  | Be                                                                                          | -2.39650500 | -0.54204600 | 0.00000000  |
| Li                                                                                                       | 0.00000000  | -2.96611500 | 0.00000000  | Li                                                                                          | 0.79274400  | 1.57207600  | 1.71805700  |
| Li                                                                                                       | 3.61781100  | -0.22010500 | 0.00000000  | Li                                                                                          | 0.79274400  | -3.10078000 | 0.00000000  |
| Li                                                                                                       | -3.61781100 | -0.22010500 | 0.00000000  | Li                                                                                          | 0.79274400  | 1.57207600  | -1.71805700 |
| <b>3C</b> CBe <sub>4</sub> Li <sub>3</sub> <sup>+</sup> (C <sub>1</sub> , <sup>1</sup> A)                |             |             |             | <b>3D</b> CBe <sub>4</sub> Li <sub>3</sub> <sup>+</sup> (C <sub>s</sub> , <sup>1</sup> A')  |             |             |             |
| C                                                                                                        | 0.46998900  | -0.65524400 | -0.14123000 | C                                                                                           | 0.00000000  | 0.88823300  | 0.00000000  |
| Be                                                                                                       | 1.96818100  | -0.52819500 | -0.74533400 | Be                                                                                          | 0.89120100  | -0.57982300 | 0.00000000  |
| Be                                                                                                       | -0.90889300 | 0.41009700  | 0.08814000  | Be                                                                                          | 1.55738200  | 1.22107400  | 0.00000000  |
| Be                                                                                                       | -0.88742500 | -1.52408800 | -0.12918100 | Be                                                                                          | -0.49385300 | -2.07860600 | 0.00000000  |
| Be                                                                                                       | 0.93913400  | 1.04661000  | -0.29724800 | Be                                                                                          | -1.24487100 | -0.14786000 | 0.00000000  |
| Li                                                                                                       | 1.56185100  | -0.30406200 | 1.67968200  | Li                                                                                          | 3.43455100  | -0.56648300 | 0.00000000  |
| Li                                                                                                       | -0.67374100 | 2.97124400  | -0.01935000 | Li                                                                                          | -1.08603800 | 2.47688300  | 0.00000000  |
| Li                                                                                                       | -3.30941900 | -0.56259400 | 0.06695800  | Li                                                                                          | -3.29499200 | -1.57324600 | 0.00000000  |
| <b>4C</b> CBe <sub>4</sub> Au <sup>-</sup> (C <sub>2v</sub> , <sup>1</sup> A <sub>1</sub> )              |             |             |             | <b>4B</b> CBe <sub>4</sub> Au <sup>-</sup> (C <sub>2v</sub> , <sup>1</sup> A <sub>1</sub> ) |             |             |             |
| C                                                                                                        | 0.00000000  | -2.59567800 | 0.00000000  | C                                                                                           | 0.00000000  | -2.85120200 | 0.00000000  |
| Be                                                                                                       | 1.49145000  | -3.20436400 | 0.00000000  | Be                                                                                          | 0.00000000  | -4.59931500 | 0.00000000  |
| Be                                                                                                       | -1.10820300 | -1.29687800 | 0.00000000  | Be                                                                                          | 0.00000000  | -1.27069500 | 0.00000000  |
| Be                                                                                                       | 1.10820300  | -1.29687800 | 0.00000000  | Be                                                                                          | 1.53682600  | -3.38341200 | 0.00000000  |
| Be                                                                                                       | -1.49145000 | -3.20436400 | 0.00000000  | Be                                                                                          | -1.53682600 | -3.38341200 | 0.00000000  |
| Au                                                                                                       | 0.00000000  | 0.65296200  | 0.00000000  | Au                                                                                          | 0.00000000  | 0.85638700  | 0.00000000  |
| <b>4C</b> CBe <sub>4</sub> Au <sup>-</sup> (C <sub>s</sub> , <sup>1</sup> A')                            |             |             |             | <b>4D</b> CBe <sub>4</sub> Au <sup>-</sup> (C <sub>s</sub> , <sup>1</sup> A')               |             |             |             |
| C                                                                                                        | -0.27127300 | -3.08091300 | 0.00000000  | C                                                                                           | -0.45165600 | -2.76050100 | 0.00000000  |
| Be                                                                                                       | 1.25142500  | -2.63036000 | 0.00000000  | Be                                                                                          | 1.07579700  | -3.34396200 | 0.00000000  |
| Be                                                                                                       | -1.86978900 | -3.15777600 | 0.00000000  | Be                                                                                          | 0.81829800  | -5.35136800 | 0.00000000  |
| Be                                                                                                       | -0.72500200 | -1.48706000 | 0.00000000  | Be                                                                                          | -0.30252200 | -1.18870800 | 0.00000000  |
| Be                                                                                                       | 1.75027500  | -0.62703000 | 0.00000000  | Be                                                                                          | -0.91408900 | -4.29701900 | 0.00000000  |
| Au                                                                                                       | 0.00000000  | 0.63410600  | 0.00000000  | Au                                                                                          | 0.00000000  | 0.92768700  | 0.00000000  |

|                                                             |             |             |             |                                                             |             |             |             |
|-------------------------------------------------------------|-------------|-------------|-------------|-------------------------------------------------------------|-------------|-------------|-------------|
| <b>5C</b> $\text{CBe}_4\text{Au}_2$ ( $C_s, {}^1A'$ )       |             |             |             | <b>5B</b> $\text{CBe}_4\text{Au}_2$ ( $C_{2v}, {}^1A_1$ )   |             |             |             |
| C                                                           | 0.13822000  | 2.26366400  | 0.00000000  | C                                                           | 0.00000000  | 0.00000000  | 1.89112100  |
| Be                                                          | 1.63653200  | 1.75161000  | 0.00000000  | Be                                                          | 0.00000000  | 1.32714500  | 0.93518800  |
| Be                                                          | 0.00000000  | 0.58428600  | 0.00000000  | Be                                                          | 0.96892700  | 0.00000000  | 3.21868600  |
| Be                                                          | -0.63271700 | 3.69218900  | 0.00000000  | Be                                                          | -0.96892700 | 0.00000000  | 3.21868600  |
| Be                                                          | -1.58194600 | 2.01497900  | 0.00000000  | Be                                                          | 0.00000000  | -1.32714500 | 0.93518800  |
| Au                                                          | -2.04533900 | -0.18899100 | 0.00000000  | Au                                                          | 0.00000000  | 3.01255600  | -0.28213800 |
| Au                                                          | 2.06411400  | -0.39017600 | 0.00000000  | Au                                                          | 0.00000000  | -3.01255600 | -0.28213800 |
| <b>5C</b> $\text{CBe}_4\text{Au}_2$ ( $C_s, {}^1A'$ )       |             |             |             | <b>5D</b> $\text{CBe}_4\text{Au}_2$ ( $C_{2v}, {}^1A_1$ )   |             |             |             |
| C                                                           | 1.19649400  | -0.02446900 | 0.00000000  | C                                                           | 0.00000000  | 0.66590000  | 0.00000000  |
| Be                                                          | 0.36437700  | -1.40058500 | 0.00000000  | Be                                                          | 1.46736300  | 1.23671300  | 0.00000000  |
| Be                                                          | 2.01179100  | 1.49361900  | 0.00000000  | Be                                                          | 0.95989800  | -0.78326300 | 0.00000000  |
| Be                                                          | 0.00000000  | 1.00946900  | 0.00000000  | Be                                                          | -1.46736300 | 1.23671300  | 0.00000000  |
| Be                                                          | 2.82579900  | -0.23196500 | 0.00000000  | Be                                                          | -0.95989800 | -0.78326300 | 0.00000000  |
| Au                                                          | 0.36773500  | 3.14068600  | 0.00000000  | Au                                                          | -3.19678300 | -0.04824700 | 0.00000000  |
| Au                                                          | -0.72199800 | -3.18290500 | 0.00000000  | Au                                                          | 3.19678300  | -0.04824700 | 0.00000000  |
| <b>6C</b> $\text{CBe}_4\text{Au}_3^+$ ( $C_{2v}, {}^1A_1$ ) |             |             |             | <b>6B</b> $\text{CBe}_4\text{Au}_3^+$ ( $C_{2v}, {}^1A_1$ ) |             |             |             |
| C                                                           | -0.00028200 | -1.41621900 | 0.00000000  | C                                                           | 0.00000000  | 0.40165200  | 0.00000000  |
| Be                                                          | -1.46274500 | -2.04734700 | 0.00000000  | Be                                                          | 1.54528600  | 0.00139300  | 0.00000000  |
| Be                                                          | -1.03784400 | -0.07427800 | 0.00000000  | Be                                                          | 0.00000000  | 2.03683400  | 0.00000000  |
| Be                                                          | 1.46219000  | -2.04755600 | 0.00000000  | Be                                                          | 0.00000000  | -1.29949800 | 0.00000000  |
| Be                                                          | 1.03750800  | -0.07477700 | 0.00000000  | Be                                                          | -1.54528600 | 0.00139300  | 0.00000000  |
| Au                                                          | 3.20420400  | -0.77585300 | 0.00000000  | Au                                                          | -2.11962200 | -2.08020100 | 0.00000000  |
| Au                                                          | 0.00047400  | 1.87376000  | 0.00000000  | Au                                                          | 0.00000000  | 4.09242200  | 0.00000000  |
| Au                                                          | -3.20461100 | -0.77546200 | 0.00000000  | Au                                                          | 2.11962200  | -2.08020100 | 0.00000000  |
| <b>6C</b> $\text{CBe}_4\text{Au}_3^+$ ( $C_{3v}, {}^1A_1$ ) |             |             |             | <b>6D</b> $\text{CBe}_4\text{Au}_3^+$ ( $C_{2v}, {}^1A_1$ ) |             |             |             |
| C                                                           | 0.00000000  | 0.00000000  | 2.31557300  | C                                                           | 0.00000000  | 0.00000000  | 0.35150900  |
| Be                                                          | 0.00000000  | 0.00000000  | 0.37585900  | Be                                                          | 0.00000000  | 1.31937300  | -0.65767600 |
| Be                                                          | 1.32388000  | -0.76434300 | 1.86646200  | Be                                                          | 0.00000000  | -1.31937300 | -0.65767600 |
| Be                                                          | 0.00000000  | 1.52868500  | 1.86646200  | Be                                                          | -0.99876900 | 0.00000000  | 1.62635200  |
| Be                                                          | -1.32388000 | -0.76434300 | 1.86646200  | Be                                                          | 0.99876900  | 0.00000000  | 1.62635200  |
| Au                                                          | 0.00000000  | 2.24657900  | -0.15947000 | Au                                                          | 0.00000000  | 0.00000000  | 3.59484400  |
| Au                                                          | 1.94559400  | -1.12328900 | -0.15947000 | Au                                                          | 0.00000000  | -2.98160400 | -1.85981700 |
| Au                                                          | -1.94559400 | -1.12328900 | -0.15947000 | Au                                                          | 0.00000000  | 2.98160400  | -1.85981700 |

**Table S2.** Orbital composition analysis for the canonical molecular orbitals (CMOs) of GM  $\text{CBe}_4\text{Li}^-$  (**1**,  $C_{2v}$ ,  $^1A_1$ ) cluster. Main components greater than 15% are shown in **bold**.

| Subsystem                  | CMO                                                                                                     | C (%)              |              | Be <sub>4</sub> (%) |              | Li (%)     |       |
|----------------------------|---------------------------------------------------------------------------------------------------------|--------------------|--------------|---------------------|--------------|------------|-------|
|                            |                                                                                                         | s/p                | total        | s/p                 | total        | s/p        | total |
| Be-Be<br>2c-2e $\sigma$    | 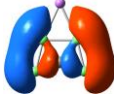<br>HOMO ( $b_2$ )     | 0.00/5.78          | 5.78         | <b>44.76/45.44</b>  | <b>90.20</b> | 0.00/3.20  | 3.20  |
|                            | <br>HOMO-1 ( $a_1$ )   | 2.72/4.03          | 6.75         | <b>26.02/62.62</b>  | <b>88.64</b> | 3.80/0.18  | 3.98  |
| Be-Li-Be<br>3c-2e $\sigma$ | <br>HOMO-2 ( $a_1$ )  | 2.35/11.56         | 13.91        | <b>55.16/18.26</b>  | <b>73.42</b> | 11.67/0.16 | 11.83 |
| 2 $\pi$<br>aromaticity     | <br>HOMO-3 ( $b_1$ ) | 0.00/ <b>70.04</b> | <b>70.04</b> | 0.00/ <b>29.14</b>  | <b>29.14</b> | 0.00/0.16  | 0.16  |
| 6 $\sigma$<br>aromaticity  | <br>HOMO-4 ( $a_1$ ) | 2.47/ <b>67.96</b> | <b>70.41</b> | 12.70/14.54         | <b>27.24</b> | 1.36/0.28  | 1.64  |
|                            | <br>HOMO-5 ( $b_2$ ) | 0.00/ <b>79.30</b> | <b>79.30</b> | 10.22/4.96          | <b>15.18</b> | 0.00/0.10  | 0.10  |
|                            | <br>HOMO-6 ( $a_1$ ) | <b>66.72</b> /0.98 | <b>67.70</b> | <b>15.76/15.72</b>  | <b>31.48</b> | 0.10/0.06  | 0.16  |

**Table S3.** Orbital composition analysis for the CMOs of GM CBe<sub>4</sub>Au<sup>-</sup> (**4**, C<sub>2v</sub>, <sup>1</sup>A<sub>1</sub>) cluster. Main components greater than 15% are shown in **bold**.

| Subsystem           | CMO                                                                                                                          | C (%)              |              | Be <sub>4</sub> (%) |              | Au (%)              |              |
|---------------------|------------------------------------------------------------------------------------------------------------------------------|--------------------|--------------|---------------------|--------------|---------------------|--------------|
|                     |                                                                                                                              | s/p                | total        | s/p                 | total        | s,p/d               | total        |
| Be-Be<br>2c-2e σ    | 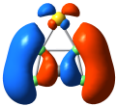<br>HOMO (b <sub>2</sub> )                  | 0.00/5.50          | 5.50         | <b>46.12/43.52</b>  | <b>89.64</b> | 2.50/1.48           | 3.98         |
|                     | <br>HOMO-1 (a <sub>1</sub> )                | 5.29/0.56          | 5.85         | <b>51.22/39.44</b>  | <b>90.66</b> | 2.50/0.58           | 3.08         |
| Be-Au-Be<br>3c-2e σ | <br>HOMO-3 (a <sub>1</sub> )                | 0.07/ <b>42.52</b> | <b>42.59</b> | 11.06/12.82         | <b>23.88</b> | <b>31.14/1.89</b>   | <b>33.13</b> |
| 2π<br>aromaticity   | <br>HOMO-2 (b <sub>1</sub> )              | 0.00/ <b>69.77</b> | <b>69.77</b> | 0.00/ <b>26.4</b>   | <b>26.4</b>  | 0.25/3.04           | 3.29         |
| 6σ<br>aromaticity   | <br>HOMO-4 (a <sub>1</sub> ) <sup>a</sup> | 0.72/ <b>22.98</b> | <b>23.70</b> | 7.46/6.92           | 14.38        | 14.49/ <b>47.41</b> | <b>61.90</b> |
|                     | <br>HOMO-9 (b <sub>2</sub> ) <sup>b</sup> | 0.00/ <b>67.93</b> | <b>67.93</b> | 11.12/7.08          | <b>18.20</b> | 0.17/13.32          | 13.49        |
|                     | <br>HOMO-11 (a <sub>1</sub> )             | <b>65.33/1.04</b>  | <b>66.37</b> | <b>16.30/15.62</b>  | <b>31.92</b> | 0.53/0.47           | 1.00         |

(continued ...)

| Subsystem     | CMO                                                                                                              | C (%)              |              | Be <sub>4</sub> (%) |              | Au (%)             |              |
|---------------|------------------------------------------------------------------------------------------------------------------|--------------------|--------------|---------------------|--------------|--------------------|--------------|
|               |                                                                                                                  | s/p                | total        | s/p                 | total        | s,p/d              | total        |
| Au lone pairs | 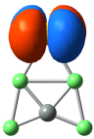<br>HOMO-5 (a <sub>2</sub> )    | 0.00/0.00          | 0.00         | 0.00/0.56           | 0.56         | 0.00/ <b>99.44</b> | <b>99.44</b> |
|               | <br>HOMO-6 (a <sub>1</sub> )    | 0.00/0.00          | 0.00         | 1.54/1.44           | 2.98         | 1.75/ <b>95.18</b> | <b>96.93</b> |
|               | <br>HOMO-7 (b <sub>1</sub> )    | 0.00/1.37          | 1.37         | 0.00/2.52           | 2.52         | 0.00/ <b>95.98</b> | <b>95.98</b> |
|               | <br>HOMO-8 (b <sub>2</sub> )  | 0.00/11.47         | 11.47        | 0.98/5.42           | 6.40         | 0.00/ <b>81.98</b> | <b>81.98</b> |
|               | <br>HOMO-10 (a <sub>1</sub> ) | 2.65/ <b>17.13</b> | <b>19.78</b> | 5.60/12.88          | <b>18.48</b> | 9.16/ <b>52.09</b> | <b>61.25</b> |

<sup>a</sup> The destructive recombination between HOMO-4 and HOMO-10 recovers a true  $\sigma$  bond around the CBe<sub>4</sub> core; its constructive counterpart is a relatively pure Au d<sub>z</sub><sup>2</sup> lone-pair.

<sup>b</sup> Similar to the above, the destructive recombination between HOMO-9 and HOMO-8 recovers a true  $\sigma$  bond around the CBe<sub>4</sub> core; its constructive counterpart is a relatively pure Au d<sub>xz</sub> lone-pair.



**Table S4.** Orbital composition analysis for the lowest unoccupied molecular orbitals (LUMOs) of the  $\text{CBe}_4\text{M}_3^+$  ( $\text{M} = \text{Li}, \text{Na}, \text{K}, \text{Cu}, \text{Ag}, \text{Au}$ ) series. Main components greater than 15% are shown in **bold**.

| Species                     | LUMO                                                                                | Symmetry | Be <sub>4</sub> (%) | M <sub>3</sub> (%) | C (%) |
|-----------------------------|-------------------------------------------------------------------------------------|----------|---------------------|--------------------|-------|
| $\text{CBe}_4\text{Li}_3^+$ | 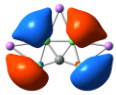   | $b_2$    | <b>88.01</b>        | 11.99              | 0.00  |
| $\text{CBe}_4\text{Na}_3^+$ |    | $b_2$    | <b>93.16</b>        | 6.81               | 0.03  |
| $\text{CBe}_4\text{K}_3^+$  |    | $b_2$    | <b>92.10</b>        | 7.83               | 0.07  |
| $\text{CBe}_4\text{Cu}_3^+$ |  | $b_2$    | <b>87.24</b>        | 12.75              | 0.01  |
| $\text{CBe}_4\text{Ag}_3^+$ |  | $b_2$    | <b>89.22</b>        | 10.76              | 0.02  |
| $\text{CBe}_4\text{Au}_3^+$ |  | $b_2$    | <b>85.5</b>         | 14.48              | 0.02  |

**Figure S1.** Optimized GM structures **1–6** of the  $\text{CBe}_4\text{M}_n^{n-2}$  ( $\text{M} = \text{Li}, \text{Au}; n = 1-3$ ) clusters at the PBE0-D3/def2-TZVPP level, along with their three lowest-lying isomers (**nB–nD**). Relative energies are listed in  $\text{kcal mol}^{-1}$  at the single-point CCSD(T) level using their PBE0-D3 geometries, with zero-point energy (ZPE) corrections at PBE0-D3. Shown in square brackets for comparison are the energetics at single-point CCSD(T)/def2-TZVPP//B3LYP-D3/def2-TZVPP level, including ZPE corrections at B3LYP-D3.

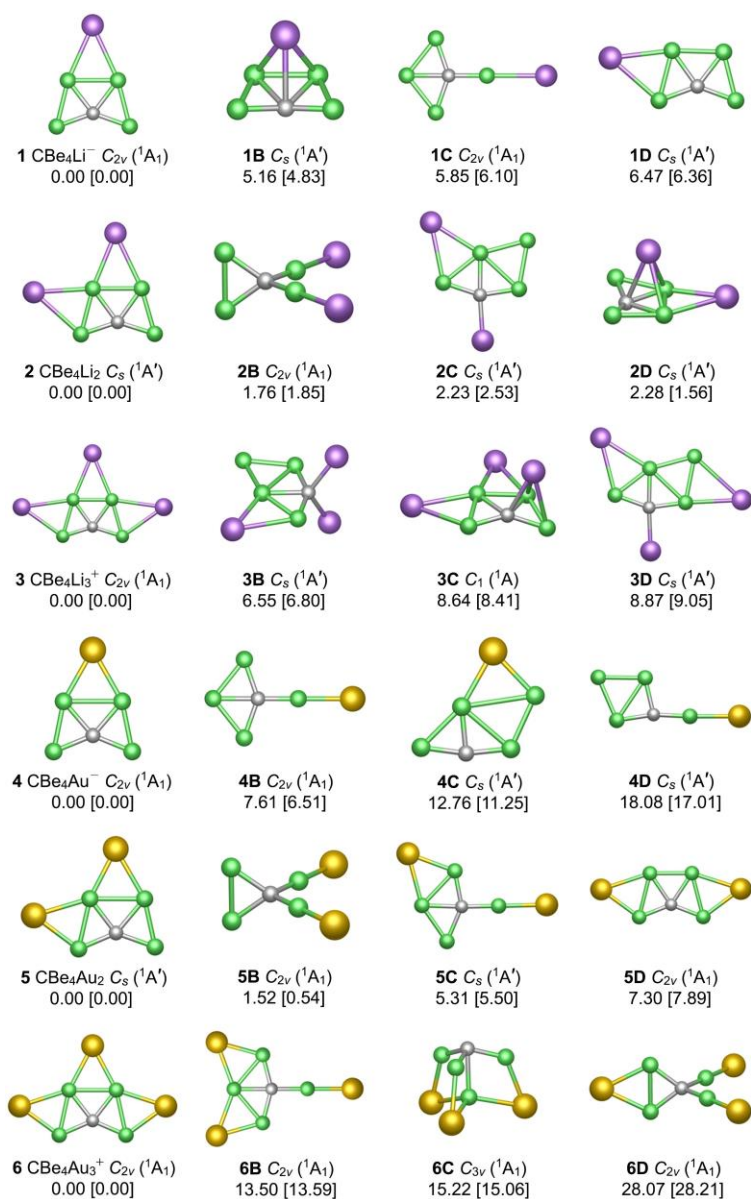

**Figure S2.** Calculated natural atomic charges (in |e|; red color) from natural bond orbital (NBO) analyses for GM clusters **1–6** of  $\text{CBe}_4\text{M}_n^{n-2}$  ( $\text{M} = \text{Li}, \text{Au}; n = 1-3$ ).

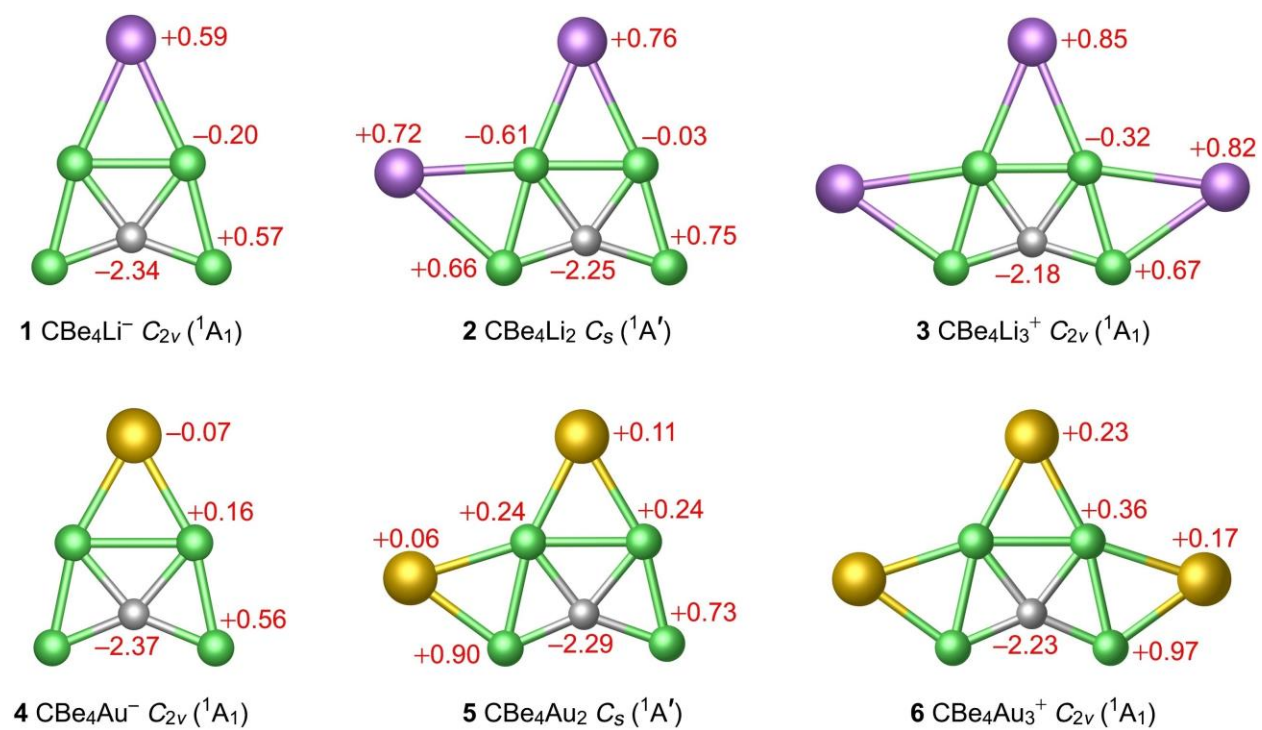

**Figure S3.** Calculated root-mean-square deviations (RMSDs) of GM clusters **1–6** of  $\text{CBe}_4\text{M}_n^{n-2}$  ( $\text{M} = \text{Li}, \text{Au}; n = 1-3$ ) during the Born-Oppenheimer molecular dynamics (BOMD) simulations at 298 K.

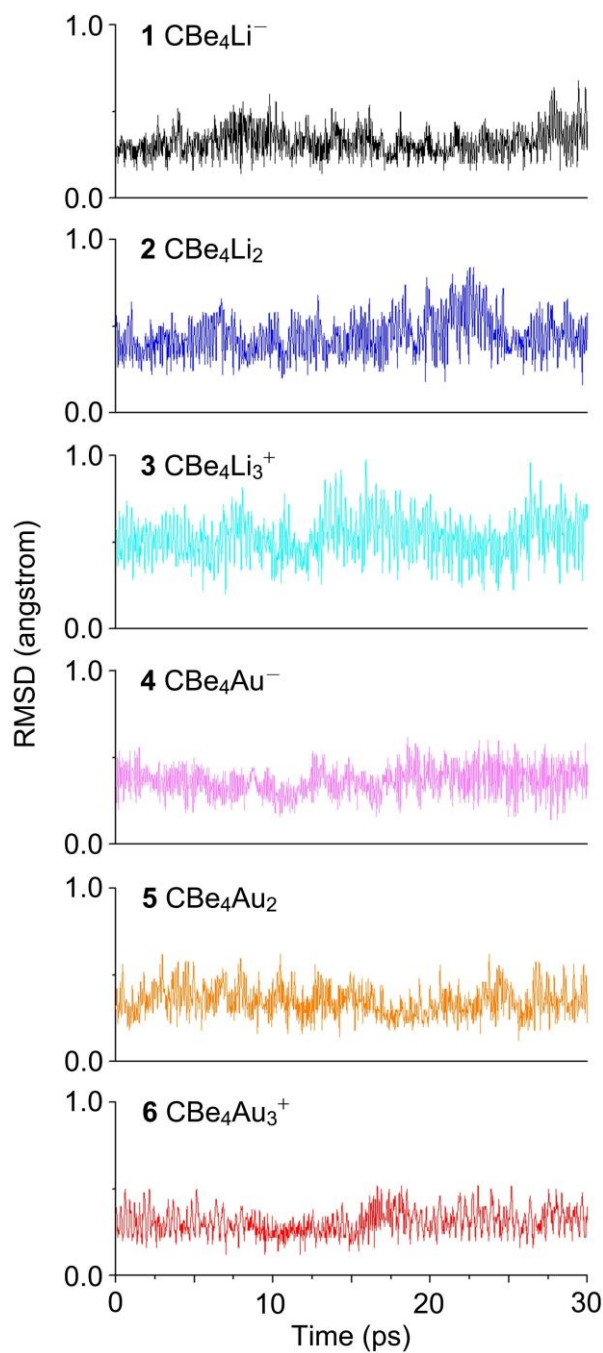

**Figure S4.** Pictures of the occupied CMOs of  $\text{CBe}_4\text{Li}^-$  (**1**) and  $\text{CBe}_4\text{Au}^-$  (**4**) clusters.

(a)  $C_{2v}$   $\text{CBe}_4\text{Li}^-$

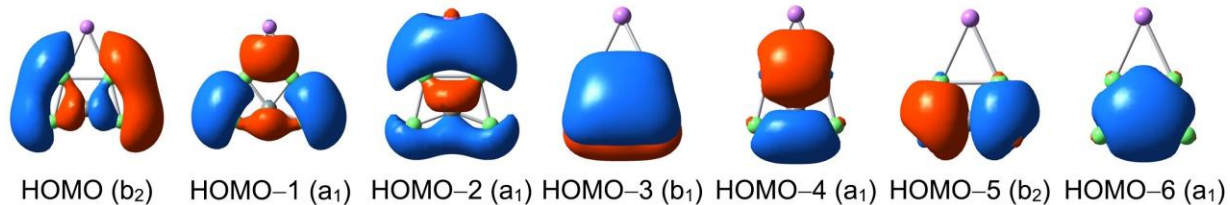

(b)  $C_{2v}$   $\text{CBe}_4\text{Au}^-$

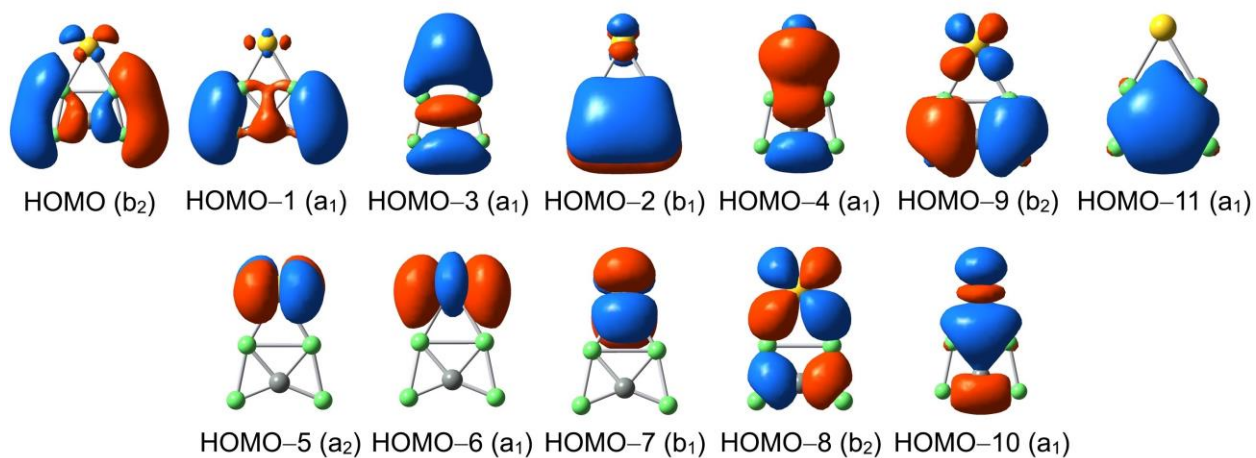

**Figure S5.** Optimized tetrahedral carbon (thC) isomeric structures **1'**/**3'**/**4'** at the PBE0-D3/def2-TZVPP level. These thC structures are to be compared to their GM ptC clusters **1/3/4**.

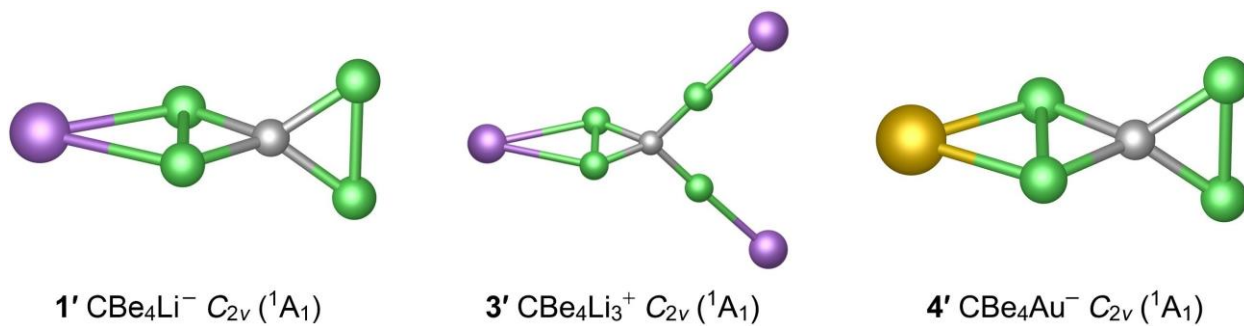

**Figure S6.** Comparison of Wiberg bond indices (WBIs) and natural atomic charges (in  $|e|$ ; red color) of GM ptC cluster **3** and thC isomer **3'** at the PBE0-D3/def2-TZVPP level.

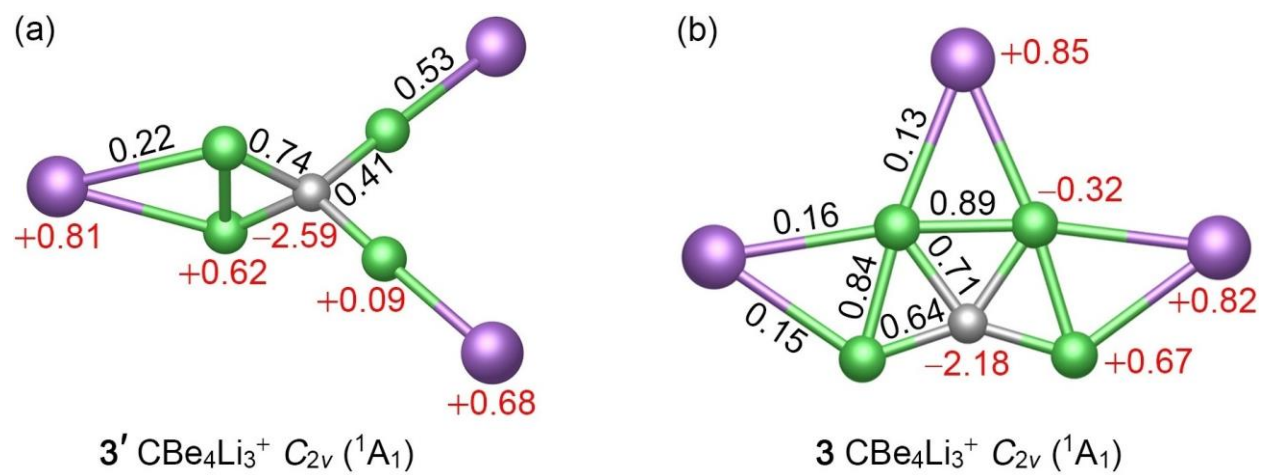

**Figure S7.** Nucleus independent chemical shifts (NICSs) for clusters **1–6**. Here the NICS(0) data (blue color) are calculated at the center of a triangle, whereas the NICS(1) values (red color) are at 1 Å above the center of a triangle or above the C center.

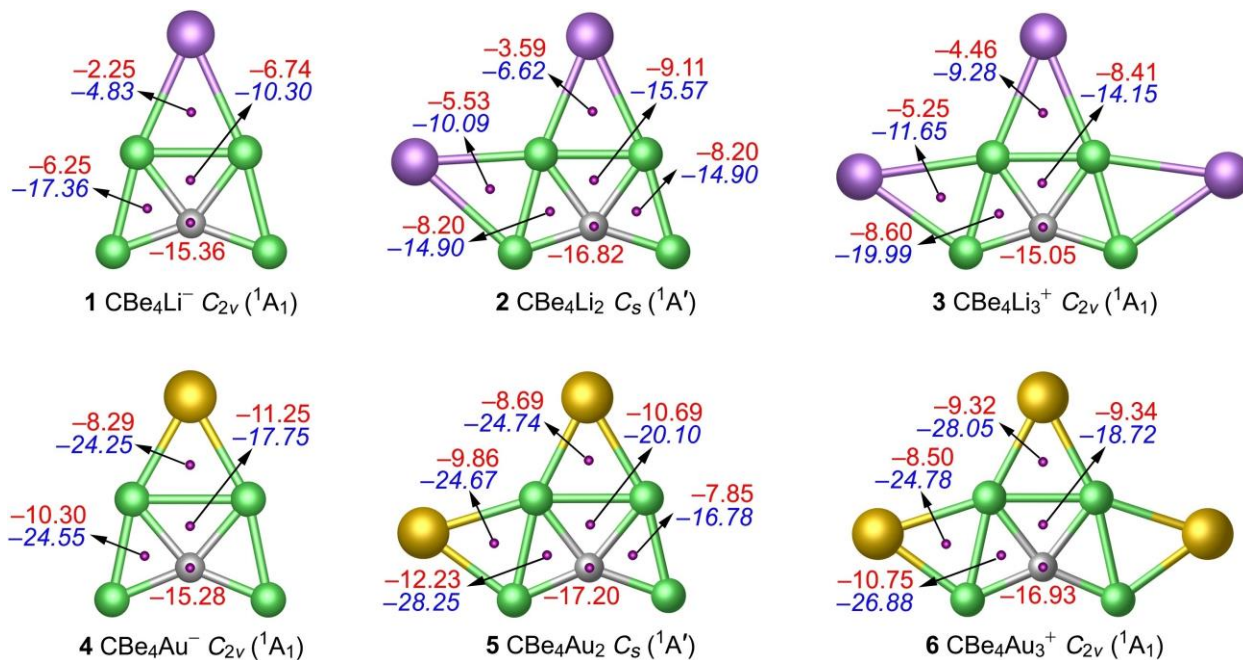

Supplement: d0nj03944f1.pdf [file d0nj03944f1.pdf]
